# Supplementary material for: MicroRNA files in the prevention of intestinal ischemia/reperfusion injury by hydrogen rich saline
Source: Oxford University Press journal article supplement (doi:10.1042/bsr20191043), 2019-12-02
Supplement: bsr-2019-1043_supp.pdf [file bsr-2019-1043_supp.pdf]

Supple Table 1: Differential miRNAs between Sham and IR groups

| miRNA id        | Read count(Sham) | Read count(IR) | Expression(Sham) | Expression(IR) | log2Ratio(IR/Sham) | Up down regulation |
|-----------------|------------------|----------------|------------------|----------------|--------------------|--------------------|
| mmu-miR-21a-5p  | 757386           | 519731         | 9599.666667      | 5186.77        | -1.431266883       | DOWN               |
| mmu-miR-378a-3p | 87506            | 7355           | 1138.303333      | 80.32333333    | -4.460587937       | DOWN               |
| mmu-miR-200a-3p | 141382           | 122238         | 1757.086667      | 1217.28        | -1.097908854       | DOWN               |
| mmu-miR-378b    | 46622            | 190913         | 498.2366667      | 1909.353333    | 1.145829303        | UP                 |
| mmu-miR-92a-3p  | 29394            | 11326          | 376.4833333      | 113.8133333    | -2.263886504       | DOWN               |
| mmu-miR-652-3p  | 34257            | 18111          | 437.1366667      | 181.91         | -1.80753585        | DOWN               |
| novel_mir1      | 40097            | 32918          | 466.01           | 349.0333333    | -1.172620858       | DOWN               |
| mmu-miR-199b-3p | 29718            | 20907          | 374.47           | 221.6166667    | -1.395354208       | DOWN               |
| novel_mir93     | 14922            | 64824          | 168.2633333      | 699.6566667    | 1.23108389         | UP                 |
| mmu-miR-3074-5p | 6140             | 57             | 79.08666667      | 0.58           | -7.639136168       | DOWN               |
| mmu-miR-5126    | 12467            | 6918           | 151.46           | 71.11          | -1.737690667       | DOWN               |
| mmu-miR-150-5p  | 10112            | 41722          | 126.07           | 433.9633333    | 1.156736706        | UP                 |
| mmu-miR-142a-5p | 2679             | 18187          | 31.57666667      | 187.3133333    | 1.875137858        | UP                 |
| mmu-miR-142b    | 877              | 11095          | 9.563333333      | 114.01         | 2.773185773        | UP                 |
| mmu-miR-31-5p   | 22781            | 20572          | 278.1833333      | 203.6466667    | -1.03515226        | DOWN               |
| mmu-miR-199a-3p | 3984             | 21854          | 43.25666667      | 210.5633333    | 1.56760457         | UP                 |
| novel_mir755    | 4959             | 24062          | 53.71666667      | 233.72         | 1.39063219         | UP                 |
| novel_mir807    | 4123             | 661            | 54.72            | 6.743333333    | -3.528975526       | DOWN               |
| mmu-miR-33-5p   | 8622             | 5413           | 108.0266667      | 54.32333333    | -1.559597416       | DOWN               |
| mmu-miR-28c     | 2840             | 15292          | 30.24033333      | 154.94         | 1.540811028        | UP                 |
| mmu-miR-28a-5p  | 2448             | 82             | 31.82333333      | 0.833333333    | -5.78783908        | DOWN               |
| mmu-miR-125a-5p | 6866             | 4086           | 86.67666667      | 41.34666667    | -1.636783895       | DOWN               |
| mmu-let-7k      | 2189             | 43             | 28.03333333      | 0.426666667    | -6.557794726       | DOWN               |
| mmu-miR-378d    | 2141             | 10             | 28.557           | 0.110666667    | -8.630144227       | DOWN               |
| mmu-miR-802-5p  | 4532             | 17434          | 51.86            | 175.21         | 1.055680606        | UP                 |
| mmu-miR-20a-5p  | 1620             | 42             | 20.71            | 0.423333333    | -6.157463917       | DOWN               |
| novel_mir669    | 273              | 4141           | 2.936666667      | 39.70666667    | 3.035003104        | UP                 |
| mmu-let-7d-3p   | 3744             | 14926          | 43.47666667      | 149.9133333    | 1.107172009        | UP                 |
| mmu-miR-182-5p  | 8246             | 7246           | 96.61666667      | 73.39          | -1.074512897       | DOWN               |
| mmu-miR-5099    | 1103             | 6953           | 12.16666667      | 70.71          | 1.768199557        | UP                 |
| mmu-miR-139-5p  | 4757             | 3159           | 59.55333333      | 31.86666667    | -1.47858733        | DOWN               |
| mmu-miR-374c-5p | 4                | 2938           | 0.050333333      | 28.85666667    | 8.632615439        | UP                 |
| mmu-miR-196a-5p | 1761             | 408            | 22.77666667      | 4.166666667    | -2.997757094       | DOWN               |
| mmu-miR-6538    | 3255             | 1784           | 39.63666667      | 17.96666667    | -1.75554517        | DOWN               |
| novel_mir296    | 3432             | 12944          | 36.73666667      | 127.98         | 1.027158813        | UP                 |
| mmu-let-7c-2-3p | 746              | 4722           | 7.953333333      | 48.01333333    | 1.774147264        | UP                 |

|                 |      |      |             |             |                   |
|-----------------|------|------|-------------|-------------|-------------------|
| mmu-miR-342-3p  | 2368 | 9281 | 28.72       | 93.40666667 | 1.082607937 UP    |
| mmu-miR-20b-5p  | 2076 | 8446 | 24.72       | 84.74333333 | 1.136458561 UP    |
| mmu-miR-374b-5p | 701  | 33   | 9.136666667 | 0.336666667 | -5.296879757 DOWN |
| novel_mir495    | 160  | 1872 | 1.82        | 19.73       | 2.660433383 UP    |
| mmu-let-7i-3p   | 288  | 2174 | 3.496666667 | 22.20333333 | 2.028207982 UP    |
| novel_mir14     | 23   | 900  | 0.244       | 9.536666667 | 4.402215993 UP    |
| novel_mir502    | 505  | 2655 | 5.736666667 | 27.74333333 | 1.506353326 UP    |
| novel_mir13     | 478  | 53   | 5.087       | 0.507333333 | -4.060949595 DOWN |
| novel_mir119    | 204  | 1627 | 2.373333333 | 16.89666667 | 2.107569952 UP    |
| mmu-miR-378c    | 409  | 13   | 5.320333333 | 0.13        | -5.863520557 DOWN |
| novel_mir785    | 378  | 44   | 4.876666667 | 0.443666667 | -3.990814048 DOWN |
| mmu-miR-101c    | 208  | 1426 | 2.263333333 | 14.46       | 1.889315306 UP    |
| novel_mir506    | 39   | 740  | 0.463666667 | 8.14        | 3.357976 UP       |
| mmu-miR-365-3p  | 201  | 1373 | 2.38        | 14.20333333 | 1.884060977 UP    |
| mmu-miR-21a-3p  | 233  | 1409 | 2.773333333 | 14.37       | 1.70826651 UP     |
| novel_mir6      | 383  | 1867 | 4.4         | 18.94666667 | 1.397302388 UP    |
| novel_mir151    | 481  | 189  | 5.556666667 | 1.826666667 | -2.235653902 DOWN |
| mmu-miR-186-5p  | 465  | 2016 | 5.413333333 | 20.35333333 | 1.228189776 UP    |
| mmu-let-7j      | 256  | 2    | 3.297       | 0.020666667 | -7.888003242 DOWN |
| mmu-miR-187-3p  | 605  | 346  | 7.513333333 | 3.696666667 | -1.694166346 DOWN |
| novel_mir297    | 71   | 696  | 0.757333333 | 6.663666667 | 2.405193134 UP    |
| novel_mir8      | 718  | 494  | 8.23        | 5.066666667 | -1.427476044 DOWN |
| mmu-miR-135a-5p | 362  | 1583 | 4.173333333 | 16.19       | 1.240596411 UP    |
| mmu-miR-15b-3p  | 599  | 2219 | 7.05        | 22.41666667 | 1.001278517 UP    |
| novel_mir259    | 135  | 826  | 1.437333333 | 7.917       | 1.725179132 UP    |
| novel_mir12     | 450  | 262  | 4.91        | 2.540333333 | -1.668361432 DOWN |
| mmu-miR-122-5p  | 330  | 146  | 4.296666667 | 1.473333333 | -2.064500897 DOWN |
| mmu-miR-500-3p  | 274  | 99   | 3.51        | 1.003333333 | -2.356678705 DOWN |
| mmu-miR-363-3p  | 385  | 205  | 4.806666667 | 2.08        | -1.797237778 DOWN |
| novel_mir496    | 14   | 289  | 0.150666667 | 3.12        | 3.479567518 UP    |
| mmu-miR-592-5p  | 126  | 7    | 1.633333333 | 0.073333333 | -5.057928243 DOWN |
| novel_mir743    | 167  | 822  | 1.813666667 | 8.366666667 | 1.411287049 UP    |
| novel_mir607    | 28   | 344  | 0.297333333 | 3.743333333 | 2.730906591 UP    |
| mmu-miR-3065-5p | 48   | 423  | 0.513666667 | 4.243333333 | 2.25154811 UP     |
| mmu-miR-467e-5p | 123  | 1    | 1.560333333 | 0.010666667 | -7.830517747 DOWN |
| novel_mir228    | 0    | 228  | 0.001       | 2.263666667 | 7.944886772 UP    |
| mmu-miR-3962    | 188  | 850  | 2.01        | 8.596666667 | 1.288726937 UP    |
| mmu-miR-132-3p  | 425  | 311  | 5.216666667 | 3.08        | -1.338551503 DOWN |

|                 |     |     |             |             |                   |
|-----------------|-----|-----|-------------|-------------|-------------------|
| mmu-miR-6240    | 80  | 501 | 0.91        | 4.993333333 | 1.758735456 UP    |
| novel_mir418    | 148 | 39  | 1.577333333 | 0.377       | -2.812054389 DOWN |
| novel_mir656    | 0   | 183 | 0.001       | 1.744       | 7.627696596 UP    |
| mmu-miR-450a-5p | 136 | 646 | 1.586666667 | 6.543333333 | 1.359924271 UP    |
| novel_mir657    | 14  | 220 | 0.150666667 | 2.416666667 | 3.08600155 UP     |
| novel_mir5      | 81  | 467 | 0.886666667 | 4.93        | 1.639425495 UP    |
| mmu-miR-99b-3p  | 212 | 844 | 2.416666667 | 8.576666667 | 1.105175492 UP    |
| mmu-miR-184-3p  | 135 | 41  | 1.446666667 | 0.406666667 | -2.607266834 DOWN |
| novel_mir463    | 56  | 375 | 0.597333333 | 4.040333333 | 1.855388621 UP    |
| novel_mir514    | 12  | 200 | 0.127333333 | 1.910333333 | 3.170890447 UP    |
| mmu-miR-431-5p  | 143 | 51  | 1.853333333 | 0.526666667 | -2.375449237 DOWN |
| mmu-miR-27a-5p  | 65  | 392 | 0.766666667 | 3.93        | 1.704338789 UP    |
| mmu-miR-744-5p  | 336 | 264 | 3.9         | 2.68        | -1.235926545 DOWN |
| novel_mir585    | 50  | 338 | 0.563666667 | 3.463333333 | 1.869020005 UP    |
| mmu-miR-712-5p  | 168 | 686 | 1.9         | 7.193333333 | 1.141744101 UP    |
| novel_mir141    | 331 | 262 | 3.996666667 | 2.676666667 | -1.225267647 DOWN |
| mmu-miR-3535    | 315 | 243 | 3.476666667 | 2.416666667 | -1.262398757 DOWN |
| mmu-miR-132-5p  | 205 | 122 | 2.606666667 | 1.213333333 | -1.636746004 DOWN |
| novel_mir392    | 74  | 0   | 0.817       | 0.001       | -8.097456608 DOWN |
| novel_mir508    | 223 | 149 | 2.666666667 | 1.546666667 | -1.469734621 DOWN |
| novel_mir722    | 0   | 111 | 0.001       | 1.16        | 6.906412624 UP    |
| mmu-miR-376b-5p | 131 | 61  | 1.683333333 | 0.616666667 | -1.990688906 DOWN |
| mmu-miR-144-3p  | 104 | 464 | 1.253333333 | 4.78        | 1.269538035 UP    |
| novel_mir22     | 99  | 440 | 1.054       | 4.197333333 | 1.263999851 UP    |
| novel_mir473    | 90  | 28  | 1.150333333 | 0.300333333 | -2.572501416 DOWN |
| novel_mir51     | 0   | 103 | 0.001       | 0.993666667 | 6.798497285 UP    |
| novel_mir452    | 0   | 100 | 0.001       | 0.954       | 6.755852948 UP    |
| novel_mir663    | 42  | 261 | 0.447       | 2.523333333 | 1.747585332 UP    |
| novel_mir49     | 95  | 34  | 1.010666667 | 0.324       | -2.370396009 DOWN |
| mmu-miR-196b-5p | 169 | 109 | 1.873333333 | 1.12        | -1.520698353 DOWN |
| novel_mir619    | 0   | 96  | 0.001       | 0.930333333 | 6.696959259 UP    |
| mmu-miR-380-3p  | 72  | 17  | 0.91        | 0.17        | -2.970465402 DOWN |
| novel_mir600    | 0   | 94  | 0.001       | 0.897333333 | 6.66658561 UP     |
| mmu-miR-107-3p  | 74  | 20  | 0.946666667 | 0.196666667 | -2.775528513 DOWN |
| mmu-miR-98-3p   | 62  | 314 | 0.7         | 3.23        | 1.452421197 UP    |
| novel_mir640    | 0   | 89  | 0.001       | 0.896666667 | 6.587730189 UP    |
| novel_mir87     | 79  | 362 | 0.947       | 4.010333333 | 1.308061897 UP    |
| mmu-miR-29a-5p  | 80  | 27  | 1.023333333 | 0.273333333 | -2.455043835 DOWN |

|                 |     |     |             |             |                   |
|-----------------|-----|-----|-------------|-------------|-------------------|
| novel_mir729    | 0   | 85  | 0.001       | 0.810666667 | 6.521387694 UP    |
| novel_mir350    | 48  | 0   | 0.510666667 | 0.001       | -7.472965743 DOWN |
| mmu-miR-29b-2-5 | 52  | 274 | 0.596666667 | 2.743333333 | 1.509589123 UP    |
| novel_mir48     | 70  | 327 | 0.747333333 | 3.140333333 | 1.335860567 UP    |
| mmu-miR-411-3p  | 50  | 6   | 0.64        | 0.063666667 | -3.946896931 DOWN |
| novel_mir766    | 0   | 82  | 0.001       | 0.784       | 6.469548763 UP    |
| novel_mir38     | 0   | 81  | 0.001       | 0.774       | 6.451846761 UP    |
| novel_mir599    | 0   | 80  | 0.001       | 0.777       | 6.433924853 UP    |
| novel_mir460    | 44  | 0   | 0.587333333 | 0.001       | -7.347434861 DOWN |
| novel_mir237    | 0   | 76  | 0.001       | 0.753333333 | 6.359924271 UP    |
| novel_mir802    | 43  | 0   | 0.496666667 | 0.001       | -7.314267997 DOWN |
| novel_mir39     | 11  | 121 | 0.117333333 | 1.154       | 2.571428377 UP    |
| novel_mir162    | 41  | 0   | 0.47        | 0.001       | -7.245555247 DOWN |
| novel_mir231    | 95  | 49  | 1.047       | 0.477       | -1.843149006 DOWN |
| mmu-miR-92a-1-5 | 18  | 145 | 0.216666667 | 1.42        | 2.121980847 UP    |
| novel_mir771    | 137 | 96  | 1.49        | 0.923666667 | -1.401072824 DOWN |
| novel_mir31     | 28  | 178 | 0.297333333 | 1.753333333 | 1.780375267 UP    |
| novel_mir34     | 20  | 150 | 0.214       | 1.430666667 | 2.018887354 UP    |
| mmu-miR-7662-3p | 36  | 2   | 0.473666667 | 0.020333333 | -5.057928243 DOWN |
| novel_mir573    | 37  | 0   | 0.394       | 0.001       | -7.097456608 DOWN |
| novel_mir751    | 0   | 65  | 0.001       | 0.620666667 | 6.134364571 UP    |
| novel_mir649    | 36  | 0   | 0.384       | 0.001       | -7.057928243 DOWN |
| mmu-miR-669o-5p | 34  | 1   | 0.437       | 0.010666667 | -5.975466083 DOWN |
| novel_mir511    | 0   | 63  | 0.001       | 0.600666667 | 6.089276682 UP    |
| mmu-miR-339-5p  | 77  | 317 | 0.903333333 | 3.266666667 | 1.153549247 UP    |
| novel_mir481    | 35  | 0   | 0.374       | 0.001       | -7.017286259 DOWN |
| novel_mir689    | 37  | 199 | 0.394       | 1.897333333 | 1.539168013 UP    |
| novel_mir96     | 0   | 61  | 0.001       | 0.580666667 | 6.042734096 UP    |
| mmu-miR-338-3p  | 85  | 45  | 1.02        | 0.493333333 | -1.805541082 DOWN |
| novel_mir795    | 53  | 16  | 0.597       | 0.154       | -2.615923697 DOWN |
| novel_mir571    | 0   | 60  | 0.001       | 0.574       | 6.018887354 UP    |
| mmu-miR-147-3p  | 160 | 132 | 1.98        | 1.313333333 | -1.165537217 DOWN |
| novel_mir482    | 0   | 59  | 0.001       | 0.600666667 | 5.994639807 UP    |
| mmu-miR-690     | 50  | 15  | 0.566666667 | 0.153333333 | -2.624968836 DOWN |
| novel_mir444    | 0   | 57  | 0.001       | 0.544       | 5.944886772 UP    |
| mmu-miR-541-5p  | 92  | 56  | 1.126666667 | 0.566666667 | -1.604210276 DOWN |
| novel_mir109    | 61  | 261 | 0.650666667 | 2.753666667 | 1.209165417 UP    |
| novel_mir445    | 31  | 0   | 0.330666667 | 0.001       | -6.842199552 DOWN |

|                 |     |     |             |             |                   |
|-----------------|-----|-----|-------------|-------------|-------------------|
| novel_mir465    | 0   | 55  | 0.001       | 0.597       | 5.893356472 UP    |
| novel_mir30     | 29  | 0   | 0.310666667 | 0.001       | -6.745984237 DOWN |
| mmu-miR-338-5p  | 52  | 230 | 0.603333333 | 2.33        | 1.257047091 UP    |
| novel_mir247    | 28  | 0   | 0.297333333 | 0.001       | -6.695358164 DOWN |
| novel_mir621    | 21  | 133 | 0.224       | 1.277       | 1.774961771 UP    |
| novel_mir190    | 0   | 50  | 0.001       | 0.477333333 | 5.755852948 UP    |
| mmu-miR-143-5p  | 59  | 246 | 0.746666667 | 2.496666667 | 1.171868214 UP    |
| mmu-miR-203-5p  | 117 | 90  | 1.426666667 | 0.906666667 | -1.266514865 DOWN |
| novel_mir405    | 82  | 50  | 0.874       | 0.490333333 | -1.601699057 DOWN |
| mmu-miR-23b-5p  | 37  | 182 | 0.433333333 | 1.803333333 | 1.410338033 UP    |
| novel_mir545    | 88  | 57  | 0.973666667 | 0.557       | -1.514544846 DOWN |
| novel_mir275    | 27  | 0   | 0.287333333 | 0.001       | -6.642890744 DOWN |
| novel_mir114    | 0   | 48  | 0.001       | 0.457333333 | 5.696959259 UP    |
| novel_mir386    | 20  | 126 | 0.214       | 1.200666667 | 1.767348587 UP    |
| novel_mir746    | 26  | 0   | 0.277       | 0.001       | -6.58844296 DOWN  |
| mmu-miR-342-5p  | 74  | 281 | 0.89        | 2.846666667 | 1.036969713 UP    |
| mmu-miR-1843a-3 | 51  | 21  | 0.636666667 | 0.216666667 | -2.168111161 DOWN |
| novel_mir333    | 25  | 0   | 0.334       | 0.001       | -6.531859432 DOWN |
| novel_mir410    | 88  | 60  | 0.937333333 | 0.574       | -1.440544265 DOWN |
| mmu-miR-330-5p  | 99  | 73  | 1.24        | 0.726666667 | -1.327535303 DOWN |
| novel_mir559    | 17  | 113 | 0.180666667 | 1.087       | 1.844712879 UP    |
| novel_mir576    | 0   | 45  | 0.001       | 0.480333333 | 5.603849854 UP    |
| novel_mir54     | 49  | 20  | 0.557       | 0.207       | -2.180784991 DOWN |
| mmu-miR-5113    | 37  | 175 | 0.436666667 | 1.75        | 1.353754504 UP    |
| novel_mir154    | 0   | 44  | 0.001       | 0.420666667 | 5.571428377 UP    |
| novel_mir158    | 24  | 0   | 0.290333333 | 0.001       | -6.472965743 DOWN |
| novel_mir107    | 24  | 0   | 0.257333333 | 0.001       | -6.472965743 DOWN |
| novel_mir712    | 0   | 43  | 0.001       | 0.413666667 | 5.538261513 UP    |
| novel_mir441    | 0   | 43  | 0.001       | 0.410666667 | 5.538261513 UP    |
| novel_mir258    | 0   | 43  | 0.001       | 0.410666667 | 5.538261513 UP    |
| novel_mir149    | 0   | 42  | 0.001       | 0.400666667 | 5.504314181 UP    |
| novel_mir491    | 0   | 41  | 0.001       | 0.457333333 | 5.469548763 UP    |
| novel_mir588    | 22  | 0   | 0.234       | 0.001       | -6.347434861 DOWN |
| mmu-miR-466f    | 10  | 82  | 0.106666667 | 0.836666667 | 2.147620668 UP    |
| mmu-miR-188-5p  | 57  | 223 | 0.686666667 | 2.243333333 | 1.080006644 UP    |
| novel_mir680    | 71  | 46  | 0.810333333 | 0.483666667 | -1.514188405 DOWN |
| mmu-miR-100-3p  | 66  | 246 | 0.783333333 | 2.52        | 1.010117144 UP    |
| novel_mir312    | 10  | 81  | 0.107333333 | 0.843333333 | 2.129918666 UP    |

|                 |     |     |             |             |              |      |
|-----------------|-----|-----|-------------|-------------|--------------|------|
| novel_mir246    | 92  | 71  | 1.013666667 | 0.707       | -1.261818079 | DOWN |
| mmu-miR-183-3p  | 35  | 11  | 0.453333333 | 0.107       | -2.55785464  | DOWN |
| novel_mir811    | 21  | 0   | 0.224       | 0.001       | -6.280320665 | DOWN |
| novel_mir759    | 21  | 0   | 0.224       | 0.001       | -6.280320665 | DOWN |
| novel_mir284    | 21  | 0   | 0.224       | 0.001       | -6.280320665 | DOWN |
| mmu-miR-329-3p  | 62  | 234 | 0.753333333 | 2.356666667 | 1.028165167  | UP   |
| novel_mir505    | 125 | 113 | 1.447       | 1.090333333 | -1.033608564 | DOWN |
| novel_mir770    | 0   | 38  | 0.001       | 0.364       | 5.359924271  | UP   |
| novel_mir321    | 0   | 38  | 0.001       | 0.364       | 5.359924271  | UP   |
| novel_mir534    | 0   | 38  | 0.001       | 0.364       | 5.359924271  | UP   |
| novel_mir41     | 33  | 10  | 0.350666667 | 0.097333333 | -2.610469266 | DOWN |
| mmu-miR-450b-3p | 56  | 216 | 0.64        | 2.166666667 | 1.059529338  | UP   |
| novel_mir800    | 20  | 0   | 0.214       | 0.001       | -6.209931337 | DOWN |
| novel_mir736    | 20  | 0   | 0.214       | 0.001       | -6.209931337 | DOWN |
| novel_mir772    | 20  | 0   | 0.214       | 0.001       | -6.209931337 | DOWN |
| novel_mir428    | 0   | 37  | 0.001       | 0.414       | 5.321450124  | UP   |
| mmu-miR-335-3p  | 30  | 142 | 0.346666667 | 1.466666667 | 1.354853282  | UP   |
| novel_mir697    | 19  | 0   | 0.204       | 0.001       | -6.135930755 | DOWN |
| mmu-miR-467h    | 19  | 0   | 0.254       | 0.001       | -6.135930755 | DOWN |
| novel_mir609    | 19  | 0   | 0.204       | 0.001       | -6.135930755 | DOWN |
| mmu-miR-377-3p  | 25  | 125 | 0.286666667 | 1.263333333 | 1.433924853  | UP   |
| novel_mir252    | 0   | 35  | 0.001       | 0.360333333 | 5.241279775  | UP   |
| novel_mir101    | 0   | 35  | 0.001       | 0.334       | 5.241279775  | UP   |
| novel_mir652    | 0   | 35  | 0.001       | 0.334       | 5.241279775  | UP   |
| novel_mir557    | 0   | 35  | 0.001       | 0.356666667 | 5.241279775  | UP   |
| novel_mir403    | 0   | 35  | 0.001       | 0.334       | 5.241279775  | UP   |
| mmu-miR-1981-3p | 54  | 206 | 0.613666667 | 2.056666667 | 1.043609783  | UP   |
| novel_mir388    | 31  | 10  | 0.330666667 | 0.097333333 | -2.520271457 | DOWN |
| novel_mir400    | 0   | 34  | 0.001       | 0.324       | 5.199459599  | UP   |
| novel_mir148    | 0   | 34  | 0.001       | 0.324       | 5.199459599  | UP   |
| mmu-miR-339-3p  | 85  | 68  | 1.03        | 0.693333333 | -1.209931337 | DOWN |
| novel_mir574    | 82  | 65  | 0.943666667 | 0.647       | -1.223187434 | DOWN |
| novel_mir40     | 15  | 91  | 0.160666667 | 0.880333333 | 1.712900803  | UP   |
| mmu-miR-331-3p  | 55  | 34  | 0.723333333 | 0.37        | -1.581900114 | DOWN |
| novel_mir198    | 0   | 33  | 0.001       | 0.314       | 5.156390877  | UP   |
| novel_mir60     | 0   | 33  | 0.001       | 0.314       | 5.156390877  | UP   |
| novel_mir61     | 0   | 33  | 0.001       | 0.314       | 5.156390877  | UP   |
| novel_mir346    | 0   | 33  | 0.001       | 0.314       | 5.156390877  | UP   |

|                 |    |     |             |             |                   |
|-----------------|----|-----|-------------|-------------|-------------------|
| novel_mir562    | 0  | 33  | 0.001       | 0.314       | 5.156390877 UP    |
| novel_mir52     | 51 | 31  | 0.544       | 0.297333333 | -1.606232274 DOWN |
| mmu-miR-467b-5p | 35 | 15  | 0.433333333 | 0.160333333 | -2.110395663 DOWN |
| novel_mir666    | 0  | 31  | 0.001       | 0.314       | 5.066193068 UP    |
| novel_mir435    | 16 | 0   | 0.170666667 | 0.001       | -5.888003242 DOWN |
| novel_mir408    | 16 | 0   | 0.170666667 | 0.001       | -5.888003242 DOWN |
| novel_mir731    | 0  | 30  | 0.001       | 0.287333333 | 5.018887354 UP    |
| novel_mir715    | 0  | 30  | 0.001       | 0.287333333 | 5.018887354 UP    |
| novel_mir782    | 0  | 30  | 0.001       | 0.287333333 | 5.018887354 UP    |
| novel_mir99     | 0  | 30  | 0.001       | 0.287333333 | 5.018887354 UP    |
| novel_mir568    | 0  | 30  | 0.001       | 0.287333333 | 5.018887354 UP    |
| mmu-miR-379-3p  | 59 | 42  | 0.733333333 | 0.433333333 | -1.378328869 DOWN |
| mmu-miR-34b-3p  | 19 | 98  | 0.226666667 | 0.993333333 | 1.478779089 UP    |
| novel_mir421    | 0  | 29  | 0.001       | 0.277333333 | 4.969977753 UP    |
| novel_mir95     | 0  | 29  | 0.001       | 0.297       | 4.969977753 UP    |
| novel_mir629    | 0  | 29  | 0.001       | 0.277333333 | 4.969977753 UP    |
| novel_mir230    | 0  | 29  | 0.001       | 0.277333333 | 4.969977753 UP    |
| novel_mir188    | 0  | 29  | 0.001       | 0.277333333 | 4.969977753 UP    |
| novel_mir477    | 0  | 29  | 0.001       | 0.324       | 4.969977753 UP    |
| novel_mir425    | 0  | 29  | 0.001       | 0.277333333 | 4.969977753 UP    |
| mmu-miR-129-2-3 | 41 | 160 | 0.496666667 | 1.623333333 | 1.076372848 UP    |
| novel_mir612    | 15 | 0   | 0.160666667 | 0.001       | -5.794893838 DOWN |
| novel_mir719    | 15 | 0   | 0.160666667 | 0.001       | -5.794893838 DOWN |
| novel_mir301    | 15 | 0   | 0.160666667 | 0.001       | -5.794893838 DOWN |
| novel_mir337    | 15 | 0   | 0.160666667 | 0.001       | -5.794893838 DOWN |
| novel_mir78     | 0  | 28  | 0.001       | 0.277       | 4.91935168 UP     |
| novel_mir165    | 0  | 28  | 0.001       | 0.267333333 | 4.91935168 UP     |
| novel_mir398    | 0  | 28  | 0.001       | 0.314       | 4.91935168 UP     |
| novel_mir671    | 0  | 28  | 0.001       | 0.267333333 | 4.91935168 UP     |
| novel_mir610    | 0  | 28  | 0.001       | 0.267333333 | 4.91935168 UP     |
| novel_mir335    | 0  | 27  | 0.001       | 0.257333333 | 4.86688426 UP     |
| novel_mir493    | 0  | 27  | 0.001       | 0.263666667 | 4.86688426 UP     |
| novel_mir490    | 0  | 27  | 0.001       | 0.257333333 | 4.86688426 UP     |
| novel_mir222    | 0  | 27  | 0.001       | 0.257333333 | 4.86688426 UP     |
| novel_mir123    | 0  | 27  | 0.001       | 0.257333333 | 4.86688426 UP     |
| novel_mir613    | 0  | 27  | 0.001       | 0.257333333 | 4.86688426 UP     |
| novel_mir563    | 0  | 27  | 0.001       | 0.257333333 | 4.86688426 UP     |
| novel_mir376    | 0  | 27  | 0.001       | 0.257333333 | 4.86688426 UP     |

|                 |    |    |             |             |                   |
|-----------------|----|----|-------------|-------------|-------------------|
| novel_mir218    | 14 | 79 | 0.187333333 | 0.860333333 | 1.608422584 UP    |
| novel_mir659    | 38 | 21 | 0.404       | 0.200666667 | -1.743613333 DOWN |
| novel_mir777    | 14 | 0  | 0.150666667 | 0.001       | -5.695358164 DOWN |
| novel_mir298    | 14 | 0  | 0.150666667 | 0.001       | -5.695358164 DOWN |
| novel_mir739    | 14 | 0  | 0.150666667 | 0.001       | -5.695358164 DOWN |
| novel_mir803    | 14 | 0  | 0.150666667 | 0.001       | -5.695358164 DOWN |
| novel_mir254    | 14 | 0  | 0.150666667 | 0.001       | -5.695358164 DOWN |
| novel_mir792    | 14 | 0  | 0.150666667 | 0.001       | -5.695358164 DOWN |
| novel_mir546    | 14 | 0  | 0.150666667 | 0.001       | -5.695358164 DOWN |
| novel_mir768    | 55 | 40 | 0.587333333 | 0.380666667 | -1.347434861 DOWN |
| novel_mir323    | 0  | 26 | 0.001       | 0.247333333 | 4.812436476 UP    |
| novel_mir26     | 0  | 26 | 0.001       | 0.247333333 | 4.812436476 UP    |
| novel_mir429    | 0  | 26 | 0.001       | 0.247333333 | 4.812436476 UP    |
| novel_mir728    | 0  | 26 | 0.001       | 0.247333333 | 4.812436476 UP    |
| novel_mir223    | 0  | 26 | 0.001       | 0.290666667 | 4.812436476 UP    |
| novel_mir443    | 0  | 26 | 0.001       | 0.267       | 4.812436476 UP    |
| novel_mir565    | 15 | 80 | 0.160666667 | 0.853666667 | 1.527034257 UP    |
| novel_mir159    | 0  | 25 | 0.001       | 0.240666667 | 4.755852948 UP    |
| novel_mir307    | 0  | 25 | 0.001       | 0.240666667 | 4.755852948 UP    |
| novel_mir79     | 0  | 25 | 0.001       | 0.240666667 | 4.755852948 UP    |
| novel_mir705    | 0  | 25 | 0.001       | 0.240666667 | 4.755852948 UP    |
| novel_mir91     | 0  | 25 | 0.001       | 0.240666667 | 4.755852948 UP    |
| novel_mir810    | 13 | 0  | 0.140666667 | 0.001       | -5.58844296 DOWN  |
| novel_mir205    | 13 | 0  | 0.140666667 | 0.001       | -5.58844296 DOWN  |
| novel_mir801    | 13 | 0  | 0.140666667 | 0.001       | -5.58844296 DOWN  |
| novel_mir168    | 26 | 11 | 0.277333333 | 0.124       | -2.129011341 DOWN |
| novel_mir303    | 0  | 24 | 0.001       | 0.230666667 | 4.696959259 UP    |
| novel_mir110    | 0  | 24 | 0.001       | 0.230666667 | 4.696959259 UP    |
| novel_mir776    | 0  | 24 | 0.001       | 0.230666667 | 4.696959259 UP    |
| mmu-miR-125b-1- | 70 | 62 | 0.873333333 | 0.636666667 | -1.063089949 DOWN |
| novel_mir488    | 12 | 0  | 0.127333333 | 0.001       | -5.472965743 DOWN |
| novel_mir315    | 12 | 0  | 0.127333333 | 0.001       | -5.472965743 DOWN |
| mmu-miR-3058-3p | 12 | 0  | 0.147       | 0.001       | -5.472965743 DOWN |
| novel_mir140    | 12 | 0  | 0.127333333 | 0.001       | -5.472965743 DOWN |
| novel_mir194    | 12 | 0  | 0.127333333 | 0.001       | -5.472965743 DOWN |
| novel_mir219    | 0  | 23 | 0.001       | 0.220666667 | 4.635558714 UP    |
| novel_mir699    | 0  | 23 | 0.001       | 0.220666667 | 4.635558714 UP    |
| novel_mir385    | 0  | 23 | 0.001       | 0.220666667 | 4.635558714 UP    |



|                 |    |    |             |             |              |      |
|-----------------|----|----|-------------|-------------|--------------|------|
| novel_mir115    | 0  | 22 | 0.001       | 0.210666667 | 4.571428377  | UP   |
| novel_mir64     | 0  | 22 | 0.001       | 0.210666667 | 4.571428377  | UP   |
| novel_mir150    | 0  | 22 | 0.001       | 0.210666667 | 4.571428377  | UP   |
| novel_mir507    | 0  | 22 | 0.001       | 0.210666667 | 4.571428377  | UP   |
| novel_mir76     | 0  | 22 | 0.001       | 0.210666667 | 4.571428377  | UP   |
| novel_mir781    | 0  | 22 | 0.001       | 0.210666667 | 4.571428377  | UP   |
| novel_mir245    | 11 | 0  | 0.147333333 | 0.001       | -5.347434861 | DOWN |
| novel_mir305    | 11 | 0  | 0.117333333 | 0.001       | -5.347434861 | DOWN |
| novel_mir324    | 11 | 0  | 0.117333333 | 0.001       | -5.347434861 | DOWN |
| novel_mir328    | 11 | 0  | 0.117333333 | 0.001       | -5.347434861 | DOWN |
| novel_mir127    | 11 | 0  | 0.117333333 | 0.001       | -5.347434861 | DOWN |
| novel_mir238    | 11 | 0  | 0.117333333 | 0.001       | -5.347434861 | DOWN |
| novel_mir344    | 11 | 0  | 0.117333333 | 0.001       | -5.347434861 | DOWN |
| mmu-miR-154-3p  | 6  | 45 | 0.07        | 0.466666667 | 2.018887354  | UP   |
| mmu-miR-190a-3p | 15 | 74 | 0.173666667 | 0.74        | 1.414559528  | UP   |
| novel_mir628    | 0  | 21 | 0.001       | 0.200666667 | 4.504314181  | UP   |
| novel_mir248    | 0  | 21 | 0.001       | 0.200666667 | 4.504314181  | UP   |
| novel_mir84     | 0  | 21 | 0.001       | 0.214       | 4.504314181  | UP   |
| novel_mir797    | 0  | 21 | 0.001       | 0.200666667 | 4.504314181  | UP   |
| novel_mir73     | 0  | 21 | 0.001       | 0.200666667 | 4.504314181  | UP   |
| novel_mir417    | 0  | 21 | 0.001       | 0.200666667 | 4.504314181  | UP   |
| novel_mir57     | 0  | 21 | 0.001       | 0.200666667 | 4.504314181  | UP   |
| novel_mir724    | 0  | 21 | 0.001       | 0.200666667 | 4.504314181  | UP   |
| mmu-miR-297b-3p | 0  | 20 | 0.001       | 0.203333333 | 4.433924853  | UP   |
| novel_mir300    | 0  | 20 | 0.001       | 0.190666667 | 4.433924853  | UP   |
| novel_mir104    | 0  | 20 | 0.001       | 0.190666667 | 4.433924853  | UP   |
| novel_mir701    | 0  | 20 | 0.001       | 0.190666667 | 4.433924853  | UP   |
| novel_mir686    | 0  | 20 | 0.001       | 0.190666667 | 4.433924853  | UP   |
| mmu-miR-5114    | 13 | 66 | 0.150333333 | 0.663333333 | 1.455951159  | UP   |
| mmu-miR-182-3p  | 31 | 19 | 0.37        | 0.193333333 | -1.594272039 | DOWN |
| novel_mir397    | 10 | 0  | 0.107333333 | 0.001       | -5.209931337 | DOWN |
| novel_mir276    | 10 | 0  | 0.107333333 | 0.001       | -5.209931337 | DOWN |
| novel_mir737    | 10 | 0  | 0.107333333 | 0.001       | -5.209931337 | DOWN |
| novel_mir395    | 10 | 0  | 0.107333333 | 0.001       | -5.209931337 | DOWN |
| novel_mir279    | 10 | 0  | 0.107333333 | 0.001       | -5.209931337 | DOWN |
| novel_mir553    | 10 | 0  | 0.107333333 | 0.001       | -5.209931337 | DOWN |
| novel_mir733    | 10 | 0  | 0.107333333 | 0.001       | -5.209931337 | DOWN |
| novel_mir263    | 10 | 0  | 0.107333333 | 0.001       | -5.209931337 | DOWN |

|                 |    |    |             |             |                   |
|-----------------|----|----|-------------|-------------|-------------------|
| novel_mir718    | 23 | 11 | 0.244       | 0.104       | -1.952133579 DOWN |
| novel_mir590    | 10 | 56 | 0.107333333 | 0.587       | 1.597423585 UP    |
| novel_mir201    | 0  | 19 | 0.001       | 0.180666667 | 4.359924271 UP    |
| novel_mir538    | 0  | 19 | 0.001       | 0.180666667 | 4.359924271 UP    |
| novel_mir651    | 0  | 19 | 0.001       | 0.180666667 | 4.359924271 UP    |
| novel_mir780    | 0  | 19 | 0.001       | 0.180666667 | 4.359924271 UP    |
| novel_mir195    | 0  | 19 | 0.001       | 0.180666667 | 4.359924271 UP    |
| novel_mir518    | 0  | 19 | 0.001       | 0.180666667 | 4.359924271 UP    |
| novel_mir710    | 0  | 19 | 0.001       | 0.180666667 | 4.359924271 UP    |
| novel_mir431    | 0  | 19 | 0.001       | 0.180666667 | 4.359924271 UP    |
| novel_mir632    | 0  | 19 | 0.001       | 0.180666667 | 4.359924271 UP    |
| novel_mir430    | 0  | 19 | 0.001       | 0.210666667 | 4.359924271 UP    |
| novel_mir642    | 0  | 19 | 0.001       | 0.180666667 | 4.359924271 UP    |
| mmu-let-7g-3p   | 8  | 48 | 0.100333333 | 0.496666667 | 1.696959259 UP    |
| mmu-miR-770-5p  | 13 | 3  | 0.163333333 | 0.030333333 | -3.003480459 DOWN |
| mmu-miR-6969-3p | 13 | 3  | 0.163333333 | 0.030666667 | -3.003480459 DOWN |
| mmu-miR-299a-5p | 10 | 1  | 0.123333333 | 0.010666667 | -4.209931337 DOWN |
| novel_mir181    | 40 | 31 | 0.427333333 | 0.297333333 | -1.255735026 DOWN |
| novel_mir808    | 0  | 18 | 0.001       | 0.170666667 | 4.281921759 UP    |
| novel_mir147    | 0  | 18 | 0.001       | 0.170666667 | 4.281921759 UP    |
| novel_mir641    | 0  | 18 | 0.001       | 0.170666667 | 4.281921759 UP    |
| novel_mir365    | 0  | 18 | 0.001       | 0.170666667 | 4.281921759 UP    |
| novel_mir336    | 0  | 18 | 0.001       | 0.170666667 | 4.281921759 UP    |
| mmu-miR-3966    | 22 | 88 | 0.234       | 0.89        | 1.111996758 UP    |
| mmu-miR-3105-3p | 26 | 98 | 0.300333333 | 0.976666667 | 1.026266884 UP    |
| mmu-miR-3970    | 7  | 43 | 0.074       | 0.433333333 | 1.730906591 UP    |
| novel_mir485    | 34 | 25 | 0.364       | 0.240666667 | -1.331609893 DOWN |
| novel_mir183    | 0  | 17 | 0.001       | 0.164       | 4.199459599 UP    |
| novel_mir470    | 0  | 17 | 0.001       | 0.164       | 4.199459599 UP    |
| novel_mir203    | 0  | 17 | 0.001       | 0.164       | 4.199459599 UP    |
| novel_mir761    | 0  | 17 | 0.001       | 0.164       | 4.199459599 UP    |
| novel_mir812    | 0  | 17 | 0.001       | 0.164       | 4.199459599 UP    |
| novel_mir171    | 0  | 17 | 0.001       | 0.164       | 4.199459599 UP    |
| novel_mir764    | 0  | 17 | 0.001       | 0.164       | 4.199459599 UP    |
| novel_mir244    | 10 | 52 | 0.107333333 | 0.503666667 | 1.490508381 UP    |
| novel_mir551    | 14 | 63 | 0.150666667 | 0.613666667 | 1.281921759 UP    |
| novel_mir302    | 0  | 16 | 0.001       | 0.154       | 4.111996758 UP    |
| novel_mir227    | 0  | 16 | 0.001       | 0.154       | 4.111996758 UP    |

|                 |    |    |             |             |                   |
|-----------------|----|----|-------------|-------------|-------------------|
| novel_mir592    | 0  | 16 | 0.001       | 0.177333333 | 4.111996758 UP    |
| novel_mir255    | 0  | 16 | 0.001       | 0.154       | 4.111996758 UP    |
| novel_mir594    | 0  | 16 | 0.001       | 0.154       | 4.111996758 UP    |
| novel_mir461    | 0  | 16 | 0.001       | 0.154       | 4.111996758 UP    |
| novel_mir402    | 0  | 16 | 0.001       | 0.154       | 4.111996758 UP    |
| novel_mir208    | 0  | 16 | 0.001       | 0.154       | 4.111996758 UP    |
| novel_mir74     | 0  | 16 | 0.001       | 0.154       | 4.111996758 UP    |
| mmu-miR-1968-5p | 48 | 44 | 0.59        | 0.443333333 | -1.013534124 DOWN |
| mmu-miR-466k    | 17 | 8  | 0.220333333 | 0.077       | -1.975466083 DOWN |
| mmu-miR-1306-3p | 19 | 75 | 0.230333333 | 0.746666667 | 1.092887935 UP    |
| novel_mir277    | 0  | 15 | 0.001       | 0.144       | 4.018887354 UP    |
| novel_mir633    | 0  | 15 | 0.001       | 0.144       | 4.018887354 UP    |
| novel_mir674    | 0  | 15 | 0.001       | 0.144       | 4.018887354 UP    |
| novel_mir177    | 0  | 15 | 0.001       | 0.144       | 4.018887354 UP    |
| novel_mir547    | 0  | 15 | 0.001       | 0.144       | 4.018887354 UP    |
| novel_mir450    | 0  | 15 | 0.001       | 0.144       | 4.018887354 UP    |
| mmu-miR-125b-2- | 35 | 29 | 0.436666667 | 0.286666667 | -1.159305264 DOWN |
| mmu-miR-341-5p  | 1  | 17 | 0.014       | 0.176666667 | 3.199459599 UP    |
| mmu-miR-186-3p  | 2  | 21 | 0.023666667 | 0.206666667 | 2.504314181 UP    |
| novel_mir693    | 0  | 14 | 0.001       | 0.134       | 3.91935168 UP     |
| novel_mir561    | 0  | 14 | 0.001       | 0.134       | 3.91935168 UP     |
| novel_mir160    | 0  | 14 | 0.001       | 0.134       | 3.91935168 UP     |
| novel_mir437    | 0  | 14 | 0.001       | 0.134       | 3.91935168 UP     |
| novel_mir58     | 0  | 14 | 0.001       | 0.134       | 3.91935168 UP     |
| novel_mir322    | 0  | 14 | 0.001       | 0.134       | 3.91935168 UP     |
| novel_mir156    | 0  | 14 | 0.001       | 0.134       | 3.91935168 UP     |
| novel_mir268    | 0  | 14 | 0.001       | 0.134       | 3.91935168 UP     |
| novel_mir320    | 0  | 14 | 0.001       | 0.134       | 3.91935168 UP     |
| novel_mir389    | 0  | 14 | 0.001       | 0.134       | 3.91935168 UP     |
| novel_mir342    | 0  | 14 | 0.001       | 0.134       | 3.91935168 UP     |
| novel_mir120    | 0  | 14 | 0.001       | 0.134       | 3.91935168 UP     |
| novel_mir250    | 0  | 14 | 0.001       | 0.134       | 3.91935168 UP     |
| novel_mir235    | 0  | 14 | 0.001       | 0.134       | 3.91935168 UP     |
| novel_mir616    | 0  | 14 | 0.001       | 0.134       | 3.91935168 UP     |
| novel_mir529    | 35 | 30 | 0.417       | 0.287333333 | -1.110395663 DOWN |
| mmu-miR-701-5p  | 16 | 64 | 0.186666667 | 0.633333333 | 1.111996758 UP    |
| novel_mir131    | 11 | 50 | 0.117333333 | 0.477333333 | 1.296421329 UP    |

Supple Table 2: Differential miRNAs between IR and HRS+IR groups

| miRNA id        | Read count(IR) | Read count(HRS+IR) | Expression(IR) | Expression(HRS+IR) | log2Ratio(HRS+IR/IR) | Up down regulation |
|-----------------|----------------|--------------------|----------------|--------------------|----------------------|--------------------|
| novel_mir506    | 740            | 10980              | 8.14           | 134.21             | 4.978910269          | UP                 |
| mmu-miR-5126    | 6918           | 17453              | 71.11          | 209.05666667       | 2.42274942           | UP                 |
| mmu-miR-199a-3p | 21854          | 765                | 210.56333333   | 9.16               | -3.74859251          | DOWN               |
| novel_mir676    | 757            | 8338               | 8.2333333333   | 100.81333333       | 4.549037463          | UP                 |
| novel_mir515    | 394            | 5926               | 4.1503333333   | 61.76              | 4.998492388          | UP                 |
| novel_mir607    | 344            | 5636               | 3.7433333333   | 69.8333333333      | 5.121892438          | UP                 |
| novel_mir1      | 32918          | 31871              | 349.03333333   | 390.80333333       | 1.041068898          | UP                 |
| mmu-miR-6538    | 1784           | 7216               | 17.966666667   | 85.0133333333      | 3.103785019          | UP                 |
| novel_mir119    | 1627           | 6888               | 16.896666667   | 87.2633333333      | 3.169572188          | UP                 |
| novel_mir755    | 24062          | 5398               | 233.72         | 68.05              | -1.068558384         | DOWN               |
| novel_mir669    | 4141           | 79                 | 39.706666667   | 1.0233333333       | -4.624281443         | DOWN               |
| novel_mir582    | 454            | 2081               | 4.5636666667   | 24.42              | 3.284214059          | UP                 |
| novel_mir5      | 467            | 1738               | 4.93           | 21.47              | 2.983634923          | UP                 |
| novel_mir520    | 558            | 1747               | 5.7166666667   | 21.69              | 2.734243877          | UP                 |
| novel_mir508    | 149            | 1228               | 1.5466666667   | 14.666666667       | 4.130627621          | UP                 |
| mmu-let-7c-2-3p | 4722           | 700                | 48.0133333333  | 9.5936666667       | -1.666269918         | DOWN               |
| mmu-miR-342-3p  | 9281           | 2178               | 93.406666667   | 26.45              | -1.00357501          | DOWN               |
| novel_mir785    | 44             | 586                | 0.4436666667   | 6.5566666667       | 4.823026532          | UP                 |
| novel_mir496    | 289            | 819                | 3.12           | 10.22              | 2.590495255          | UP                 |
| mmu-miR-296-5p  | 1749           | 1936               | 18.076666667   | 23.566666667       | 1.234249959          | UP                 |
| mmu-miR-677-5p  | 2936           | 520                | 29.7633333333  | 6.3033333333       | -1.409567144         | DOWN               |
| novel_mir473    | 28             | 364                | 0.3003333333   | 4.2766666667       | 4.788141014          | UP                 |
| novel_mir259    | 826            | 29                 | 7.917          | 0.3973333333       | -3.74431568          | DOWN               |
| novel_mir15     | 487            | 783                | 5.1603333333   | 10.3633333333      | 1.772791831          | UP                 |
| novel_mir468    | 175            | 471                | 1.8            | 5.85               | 2.516073434          | UP                 |
| mmu-miR-574-5p  | 2767           | 602                | 27.706666667   | 7.3633333333       | -1.112785956         | DOWN               |
| novel_mir465    | 55             | 256                | 0.597          | 3.1733333333       | 3.306341583          | UP                 |
| novel_mir6      | 1867           | 377                | 18.946666667   | 4.8033333333       | -1.220384203         | DOWN               |
| mmu-let-7a-1-3p | 1004           | 1017               | 10.256666667   | 11.67              | 1.106261706          | UP                 |
| novel_mir495    | 1872           | 392                | 19.73          | 4.5166666667       | -1.167953579         | DOWN               |
| novel_mir297    | 696            | 66                 | 6.6636666667   | 0.8403333333       | -2.31084808          | DOWN               |
| novel_mir585    | 338            | 504                | 3.4633333333   | 6.1866666667       | 1.664101783          | UP                 |
| novel_mir8      | 494            | 626                | 5.0666666667   | 8.0466666667       | 1.429352911          | UP                 |
| novel_mir491    | 41             | 211                | 0.4573333333   | 2.667              | 3.45124848           | UP                 |
| mmu-miR-2137    | 473            | 583                | 4.9333333333   | 6.32               | 1.389356996          | UP                 |
| mmu-miR-3470b   | 268            | 408                | 2.6766666667   | 5.0233333333       | 1.694037448          | UP                 |

|                 |     |     |             |             |              |      |
|-----------------|-----|-----|-------------|-------------|--------------|------|
| mmu-miR-3470a   | 289 | 421 | 2.896666667 | 5.14        | 1.630452037  | UP   |
| mmu-miR-532-3p  | 45  | 180 | 0.466666667 | 2.263333333 | 3.087701296  | UP   |
| novel_mir525    | 0   | 173 | 0.001       | 2.083333333 | 9.522329524  | UP   |
| novel_mir14     | 900 | 148 | 9.536666667 | 1.893333333 | -1.516626529 | DOWN |
| novel_mir610    | 28  | 143 | 0.267333333 | 1.857       | 3.440217711  | UP   |
| novel_mir240    | 96  | 214 | 1.003333333 | 2.543333333 | 2.244205782  | UP   |
| mmu-miR-714     | 98  | 212 | 1.006666667 | 2.58        | 2.200911907  | UP   |
| mmu-miR-5121    | 808 | 142 | 8.053333333 | 1.8         | -1.420763067 | DOWN |
| novel_mir19     | 456 | 49  | 4.433333333 | 0.674       | -2.130478874 | DOWN |
| novel_mir228    | 228 | 0   | 2.263666667 | 0.001       | -7.745188718 | DOWN |
| novel_mir22     | 440 | 51  | 4.197333333 | 0.700666667 | -2.021233075 | DOWN |
| novel_mir471    | 283 | 349 | 2.95        | 4.326666667 | 1.390126279  | UP   |
| novel_mir72     | 57  | 153 | 0.6         | 1.803333333 | 2.512199125  | UP   |
| novel_mir689    | 199 | 0   | 1.897333333 | 0.001       | -7.548923324 | DOWN |
| mmu-miR-338-3p  | 45  | 132 | 0.493333333 | 1.62        | 2.640242319  | UP   |
| novel_mir656    | 183 | 0   | 1.744       | 0.001       | -7.427998542 | DOWN |
| novel_mir87     | 362 | 40  | 4.010333333 | 0.523666667 | -2.090216496 | DOWN |
| novel_mir448    | 0   | 91  | 0.001       | 1.090333333 | 8.595495936  | UP   |
| novel_mir657    | 220 | 277 | 2.416666667 | 3.396666667 | 1.420083749  | UP   |
| novel_mir722    | 111 | 183 | 1.16        | 2.163333333 | 1.808985268  | UP   |
| novel_mir354    | 83  | 157 | 0.867       | 1.993333333 | 2.007282614  | UP   |
| novel_mir659    | 21  | 90  | 0.200666667 | 1.113333333 | 3.18723697   | UP   |
| novel_mir18     | 136 | 194 | 1.4         | 2.52        | 1.600151297  | UP   |
| novel_mir13     | 53  | 118 | 0.507333333 | 1.553666667 | 2.242423891  | UP   |
| novel_mir163    | 11  | 70  | 0.124       | 0.873666667 | 3.757552694  | UP   |
| mmu-miR-3065-5p | 423 | 70  | 4.243333333 | 0.88        | -1.50752954  | DOWN |
| novel_mir89     | 0   | 66  | 0.001       | 0.777333333 | 8.132095415  | UP   |
| novel_mir680    | 46  | 101 | 0.483666667 | 1.33        | 2.222350823  | UP   |
| novel_mir452    | 100 | 0   | 0.954       | 0.001       | -6.556154894 | DOWN |
| novel_mir141    | 262 | 259 | 2.676666667 | 3.113333333 | 1.071086582  | UP   |
| novel_mir619    | 96  | 0   | 0.930333333 | 0.001       | -6.497261205 | DOWN |
| novel_mir24     | 338 | 59  | 3.25        | 0.810666667 | -1.430535091 | DOWN |
| novel_mir600    | 94  | 0   | 0.897333333 | 0.001       | -6.466887556 | DOWN |
| novel_mir202    | 0   | 47  | 0.001       | 0.573666667 | 7.642290148  | UP   |
| mmu-miR-6240    | 501 | 111 | 4.993333333 | 1.306666667 | -1.086549631 | DOWN |
| novel_mir729    | 85  | 0   | 0.810666667 | 0.001       | -6.32168964  | DOWN |
| novel_mir766    | 82  | 0   | 0.784       | 0.001       | -6.269850709 | DOWN |
| mmu-miR-18b-5p  | 217 | 215 | 2.193333333 | 2.493333333 | 1.074342913  | UP   |

|                |     |    |             |             |              |      |
|----------------|-----|----|-------------|-------------|--------------|------|
| novel_mir38    | 81  | 0  | 0.774       | 0.001       | -6.252148707 | DOWN |
| novel_mir580   | 80  | 0  | 0.773666667 | 0.001       | -6.234226799 | DOWN |
| novel_mir599   | 80  | 0  | 0.777       | 0.001       | -6.234226799 | DOWN |
| mmu-miR-6236   | 7   | 44 | 0.077       | 0.540333333 | 3.739777993  | UP   |
| novel_mir70    | 10  | 46 | 0.097333333 | 0.543333333 | 3.289335157  | UP   |
| novel_mir124   | 0   | 36 | 0.001       | 0.494       | 7.257626298  | UP   |
| novel_mir155   | 161 | 19 | 1.537333333 | 0.260666667 | -1.995288069 | DOWN |
| novel_mir386   | 126 | 11 | 1.200666667 | 0.130666667 | -2.430147009 | DOWN |
| novel_mir802   | 0   | 35 | 0.001       | 0.387       | 7.216984313  | UP   |
| novel_mir587   | 69  | 0  | 0.667       | 0.001       | -6.020823161 | DOWN |
| novel_mir784   | 68  | 0  | 0.657       | 0.001       | -5.999761545 | DOWN |
| novel_mir783   | 230 | 40 | 2.227       | 0.550666667 | -1.43586066  | DOWN |
| novel_mir511   | 63  | 0  | 0.600666667 | 0.001       | -5.889578627 | DOWN |
| novel_mir551   | 63  | 0  | 0.613666667 | 0.001       | -5.889578627 | DOWN |
| novel_mir588   | 0   | 30 | 0.001       | 0.410666667 | 6.994591892  | UP   |
| novel_mir126   | 60  | 0  | 0.590333333 | 0.001       | -5.8191893   | DOWN |
| novel_mir571   | 60  | 0  | 0.574       | 0.001       | -5.8191893   | DOWN |
| novel_mir410   | 60  | 0  | 0.574       | 0.001       | -5.8191893   | DOWN |
| novel_mir700   | 0   | 29 | 0.001       | 0.340666667 | 6.945682291  | UP   |
| novel_mir482   | 59  | 0  | 0.600666667 | 0.001       | -5.794941753 | DOWN |
| novel_mir444   | 57  | 0  | 0.544       | 0.001       | -5.745188718 | DOWN |
| novel_mir278   | 57  | 0  | 0.544       | 0.001       | -5.745188718 | DOWN |
| novel_mir611   | 12  | 40 | 0.114       | 0.550666667 | 2.82466689   | UP   |
| novel_mir590   | 56  | 0  | 0.587       | 0.001       | -5.719653626 | DOWN |
| novel_mir514   | 200 | 35 | 1.910333333 | 0.480666667 | -1.426871877 | DOWN |
| novel_mir541   | 54  | 0  | 0.546666667 | 0.001       | -5.667186206 | DOWN |
| novel_mir626   | 54  | 0  | 0.514       | 0.001       | -5.667186206 | DOWN |
| novel_mir244   | 52  | 0  | 0.503666667 | 0.001       | -5.612738422 | DOWN |
| novel_mir801   | 0   | 25 | 0.001       | 0.344       | 6.731557486  | UP   |
| novel_mir405   | 50  | 0  | 0.490333333 | 0.001       | -5.556154894 | DOWN |
| novel_mir190   | 50  | 0  | 0.477333333 | 0.001       | -5.556154894 | DOWN |
| novel_mir53    | 49  | 0  | 0.467333333 | 0.001       | -5.527008548 | DOWN |
| mmu-miR-351-5p | 282 | 64 | 2.866666667 | 0.766666667 | -1.051850056 | DOWN |
| novel_mir359   | 0   | 23 | 0.001       | 0.317333333 | 6.611263252  | UP   |
| novel_mir114   | 48  | 0  | 0.457333333 | 0.001       | -5.497261205 | DOWN |
| novel_mir39    | 121 | 16 | 1.154       | 0.220666667 | -1.831161941 | DOWN |
| novel_mir180   | 134 | 20 | 1.283666667 | 0.274       | -1.656459799 | DOWN |
| novel_mir59    | 46  | 0  | 0.440666667 | 0.001       | -5.43586066  | DOWN |

|                 |     |     |             |             |              |      |
|-----------------|-----|-----|-------------|-------------|--------------|------|
| novel_mir576    | 45  | 0   | 0.480333333 | 0.001       | -5.4041518   | DOWN |
| novel_mir213    | 106 | 109 | 1.046666667 | 1.497333333 | 1.127965166  | UP   |
| novel_mir527    | 0   | 21  | 0.001       | 0.287333333 | 6.480018719  | UP   |
| novel_mir182    | 44  | 0   | 0.420666667 | 0.001       | -5.371730323 | DOWN |
| mmu-miR-3084-3p | 18  | 40  | 0.18        | 0.476666667 | 2.23970439   | UP   |
| novel_mir267    | 43  | 0   | 0.410666667 | 0.001       | -5.338563459 | DOWN |
| novel_mir441    | 43  | 0   | 0.410666667 | 0.001       | -5.338563459 | DOWN |
| novel_mir258    | 43  | 0   | 0.410666667 | 0.001       | -5.338563459 | DOWN |
| mmu-miR-322-3p  | 235 | 52  | 2.363333333 | 0.636666667 | -1.088375932 | DOWN |
| novel_mir570    | 0   | 20  | 0.001       | 0.237333333 | 6.409629391  | UP   |
| novel_mir337    | 0   | 20  | 0.001       | 0.253666667 | 6.409629391  | UP   |
| novel_mir34     | 150 | 26  | 1.430666667 | 0.357333333 | -1.440677676 | DOWN |
| novel_mir149    | 42  | 0   | 0.400666667 | 0.001       | -5.304616127 | DOWN |
| novel_mir231    | 49  | 65  | 0.477       | 0.870333333 | 1.495359265  | UP   |
| novel_mir504    | 41  | 0   | 0.390666667 | 0.001       | -5.269850709 | DOWN |
| novel_mir138    | 0   | 19  | 0.001       | 0.260666667 | 6.33562881   | UP   |
| novel_mir768    | 40  | 0   | 0.380666667 | 0.001       | -5.234226799 | DOWN |
| novel_mir523    | 0   | 18  | 0.001       | 0.247333333 | 6.257626298  | UP   |
| novel_mir770    | 38  | 0   | 0.364       | 0.001       | -5.160226217 | DOWN |
| novel_mir321    | 38  | 0   | 0.364       | 0.001       | -5.160226217 | DOWN |
| novel_mir117    | 37  | 0   | 0.354       | 0.001       | -5.12175207  | DOWN |
| novel_mir608    | 37  | 0   | 0.367       | 0.001       | -5.12175207  | DOWN |
| mmu-miR-17-3p   | 221 | 51  | 2.223333333 | 0.61        | -1.027775921 | DOWN |
| novel_mir645    | 0   | 17  | 0.001       | 0.234       | 6.175164137  | UP   |
| novel_mir746    | 0   | 17  | 0.001       | 0.234       | 6.175164137  | UP   |
| novel_mir579    | 117 | 19  | 1.117333333 | 0.260666667 | -1.53473591  | DOWN |
| mmu-miR-669c-5p | 144 | 27  | 1.463333333 | 0.340333333 | -1.327336203 | DOWN |
| mmu-miR-331-3p  | 34  | 49  | 0.37        | 0.613333333 | 1.614948299  | UP   |
| novel_mir252    | 35  | 0   | 0.360333333 | 0.001       | -5.041581721 | DOWN |
| novel_mir101    | 35  | 0   | 0.334       | 0.001       | -5.041581721 | DOWN |
| novel_mir652    | 35  | 0   | 0.334       | 0.001       | -5.041581721 | DOWN |
| novel_mir557    | 35  | 0   | 0.356666667 | 0.001       | -5.041581721 | DOWN |
| novel_mir403    | 35  | 0   | 0.334       | 0.001       | -5.041581721 | DOWN |
| novel_mir457    | 0   | 16  | 0.001       | 0.187333333 | 6.087701296  | UP   |
| novel_mir100    | 0   | 16  | 0.001       | 0.220666667 | 6.087701296  | UP   |
| novel_mir366    | 0   | 16  | 0.001       | 0.220666667 | 6.087701296  | UP   |
| novel_mir130    | 0   | 16  | 0.001       | 0.220666667 | 6.087701296  | UP   |
| novel_mir400    | 34  | 0   | 0.324       | 0.001       | -4.999761545 | DOWN |

|                 |     |    |             |             |              |      |
|-----------------|-----|----|-------------|-------------|--------------|------|
| novel_mir148    | 34  | 0  | 0.324       | 0.001       | -4.999761545 | DOWN |
| novel_mir49     | 34  | 0  | 0.324       | 0.001       | -4.999761545 | DOWN |
| novel_mir218    | 79  | 10 | 0.860333333 | 0.137333333 | -1.894151357 | DOWN |
| mmu-miR-3068-3p | 6   | 22 | 0.063333333 | 0.26        | 2.962170414  | UP   |
| novel_mir198    | 33  | 0  | 0.314       | 0.001       | -4.956692823 | DOWN |
| novel_mir60     | 33  | 0  | 0.314       | 0.001       | -4.956692823 | DOWN |
| novel_mir61     | 33  | 0  | 0.314       | 0.001       | -4.956692823 | DOWN |
| novel_mir346    | 33  | 0  | 0.314       | 0.001       | -4.956692823 | DOWN |
| novel_mir562    | 33  | 0  | 0.314       | 0.001       | -4.956692823 | DOWN |
| novel_mir107    | 0   | 15 | 0.001       | 0.207333333 | 5.994591892  | UP   |
| novel_mir666    | 31  | 0  | 0.314       | 0.001       | -4.866495014 | DOWN |
| novel_mir476    | 31  | 0  | 0.297333333 | 0.001       | -4.866495014 | DOWN |
| novel_mir52     | 31  | 0  | 0.297333333 | 0.001       | -4.866495014 | DOWN |
| mmu-miR-23b-5p  | 182 | 42 | 1.803333333 | 0.53        | -1.027775921 | DOWN |
| novel_mir762    | 0   | 14 | 0.001       | 0.194       | 5.895056218  | UP   |
| novel_mir113    | 0   | 14 | 0.001       | 0.194       | 5.895056218  | UP   |
| novel_mir800    | 0   | 14 | 0.001       | 0.194       | 5.895056218  | UP   |
| novel_mir731    | 30  | 0  | 0.287333333 | 0.001       | -4.8191893   | DOWN |
| novel_mir715    | 30  | 0  | 0.287333333 | 0.001       | -4.8191893   | DOWN |
| novel_mir782    | 30  | 0  | 0.287333333 | 0.001       | -4.8191893   | DOWN |
| novel_mir568    | 30  | 0  | 0.287333333 | 0.001       | -4.8191893   | DOWN |
| novel_mir167    | 86  | 13 | 0.833666667 | 0.177333333 | -1.63812374  | DOWN |
| novel_mir421    | 29  | 0  | 0.277333333 | 0.001       | -4.770279699 | DOWN |
| novel_mir95     | 29  | 0  | 0.297       | 0.001       | -4.770279699 | DOWN |
| novel_mir629    | 29  | 0  | 0.277333333 | 0.001       | -4.770279699 | DOWN |
| novel_mir230    | 29  | 0  | 0.277333333 | 0.001       | -4.770279699 | DOWN |
| novel_mir188    | 29  | 0  | 0.277333333 | 0.001       | -4.770279699 | DOWN |
| novel_mir477    | 29  | 0  | 0.324       | 0.001       | -4.770279699 | DOWN |
| novel_mir425    | 29  | 0  | 0.277333333 | 0.001       | -4.770279699 | DOWN |
| novel_mir170    | 60  | 64 | 0.596666667 | 0.807       | 1.1808107    | UP   |
| novel_mir542    | 0   | 13 | 0.001       | 0.177333333 | 5.788141014  | UP   |
| novel_mir153    | 0   | 13 | 0.001       | 0.177333333 | 5.788141014  | UP   |
| novel_mir733    | 0   | 13 | 0.001       | 0.177333333 | 5.788141014  | UP   |
| novel_mir77     | 0   | 13 | 0.001       | 0.154       | 5.788141014  | UP   |
| novel_mir251    | 0   | 13 | 0.001       | 0.154       | 5.788141014  | UP   |
| novel_mir165    | 28  | 0  | 0.267333333 | 0.001       | -4.719653626 | DOWN |
| novel_mir398    | 28  | 0  | 0.314       | 0.001       | -4.719653626 | DOWN |
| novel_mir672    | 28  | 0  | 0.267333333 | 0.001       | -4.719653626 | DOWN |



|              |    |    |             |             |              |      |
|--------------|----|----|-------------|-------------|--------------|------|
| novel_mir671 | 28 | 0  | 0.267333333 | 0.001       | -4.719653626 | DOWN |
| novel_mir544 | 27 | 0  | 0.257333333 | 0.001       | -4.667186206 | DOWN |
| novel_mir335 | 27 | 0  | 0.257333333 | 0.001       | -4.667186206 | DOWN |
| novel_mir493 | 27 | 0  | 0.263666667 | 0.001       | -4.667186206 | DOWN |
| novel_mir490 | 27 | 0  | 0.257333333 | 0.001       | -4.667186206 | DOWN |
| novel_mir222 | 27 | 0  | 0.257333333 | 0.001       | -4.667186206 | DOWN |
| novel_mir123 | 27 | 0  | 0.257333333 | 0.001       | -4.667186206 | DOWN |
| novel_mir613 | 27 | 0  | 0.257333333 | 0.001       | -4.667186206 | DOWN |
| novel_mir563 | 27 | 0  | 0.257333333 | 0.001       | -4.667186206 | DOWN |
| novel_mir376 | 27 | 0  | 0.257333333 | 0.001       | -4.667186206 | DOWN |
| novel_mir419 | 0  | 12 | 0.001       | 0.164       | 5.672663797  | UP   |
| novel_mir566 | 0  | 12 | 0.001       | 0.164       | 5.672663797  | UP   |
| novel_mir581 | 0  | 12 | 0.001       | 0.164       | 5.672663797  | UP   |
| novel_mir618 | 0  | 12 | 0.001       | 0.164       | 5.672663797  | UP   |
| novel_mir685 | 0  | 12 | 0.001       | 0.164       | 5.672663797  | UP   |
| novel_mir212 | 0  | 12 | 0.001       | 0.164       | 5.672663797  | UP   |
| novel_mir732 | 0  | 12 | 0.001       | 0.140666667 | 5.672663797  | UP   |
| novel_mir573 | 0  | 12 | 0.001       | 0.164       | 5.672663797  | UP   |
| novel_mir162 | 0  | 12 | 0.001       | 0.164       | 5.672663797  | UP   |
| novel_mir772 | 0  | 12 | 0.001       | 0.164       | 5.672663797  | UP   |
| novel_mir344 | 0  | 12 | 0.001       | 0.140666667 | 5.672663797  | UP   |
| novel_mir323 | 26 | 0  | 0.247333333 | 0.001       | -4.612738422 | DOWN |
| novel_mir429 | 26 | 0  | 0.247333333 | 0.001       | -4.612738422 | DOWN |
| novel_mir728 | 26 | 0  | 0.247333333 | 0.001       | -4.612738422 | DOWN |
| novel_mir443 | 26 | 0  | 0.267       | 0.001       | -4.612738422 | DOWN |
| novel_mir237 | 76 | 12 | 0.753333333 | 0.164       | -1.575263717 | DOWN |
| novel_mir159 | 25 | 0  | 0.240666667 | 0.001       | -4.556154894 | DOWN |
| novel_mir485 | 25 | 0  | 0.240666667 | 0.001       | -4.556154894 | DOWN |
| novel_mir79  | 25 | 0  | 0.240666667 | 0.001       | -4.556154894 | DOWN |
| novel_mir705 | 25 | 0  | 0.240666667 | 0.001       | -4.556154894 | DOWN |
| novel_mir91  | 25 | 0  | 0.240666667 | 0.001       | -4.556154894 | DOWN |
| novel_mir754 | 0  | 11 | 0.001       | 0.150666667 | 5.547132915  | UP   |
| novel_mir454 | 0  | 11 | 0.001       | 0.150666667 | 5.547132915  | UP   |
| novel_mir614 | 0  | 11 | 0.001       | 0.130666667 | 5.547132915  | UP   |
| novel_mir392 | 0  | 11 | 0.001       | 0.130666667 | 5.547132915  | UP   |
| novel_mir727 | 0  | 11 | 0.001       | 0.150666667 | 5.547132915  | UP   |
| novel_mir795 | 16 | 27 | 0.154       | 0.370666667 | 1.842588798  | UP   |
| novel_mir303 | 24 | 0  | 0.230666667 | 0.001       | -4.497261205 | DOWN |

|                 |     |    |             |             |              |      |
|-----------------|-----|----|-------------|-------------|--------------|------|
| novel_mir110    | 24  | 0  | 0.230666667 | 0.001       | -4.497261205 | DOWN |
| novel_mir776    | 24  | 0  | 0.230666667 | 0.001       | -4.497261205 | DOWN |
| mmu-miR-3071-5p | 15  | 26 | 0.157       | 0.31        | 1.881250419  | UP   |
| novel_mir574    | 65  | 63 | 0.647       | 0.864       | 1.042613407  | UP   |
| novel_mir99     | 30  | 38 | 0.287333333 | 0.520666667 | 1.428738214  | UP   |
| novel_mir638    | 73  | 12 | 0.737       | 0.140666667 | -1.517160762 | DOWN |
| novel_mir219    | 23  | 0  | 0.220666667 | 0.001       | -4.43586066  | DOWN |
| novel_mir699    | 23  | 0  | 0.220666667 | 0.001       | -4.43586066  | DOWN |
| novel_mir385    | 23  | 0  | 0.220666667 | 0.001       | -4.43586066  | DOWN |
| novel_mir549    | 0   | 10 | 0.001       | 0.117333333 | 5.409629391  | UP   |
| novel_mir233    | 0   | 10 | 0.001       | 0.117333333 | 5.409629391  | UP   |
| novel_mir445    | 0   | 10 | 0.001       | 0.117333333 | 5.409629391  | UP   |
| novel_mir30     | 0   | 10 | 0.001       | 0.137333333 | 5.409629391  | UP   |
| novel_mir753    | 0   | 10 | 0.001       | 0.137333333 | 5.409629391  | UP   |
| novel_mir439    | 0   | 10 | 0.001       | 0.137333333 | 5.409629391  | UP   |
| novel_mir735    | 0   | 10 | 0.001       | 0.137333333 | 5.409629391  | UP   |
| novel_mir94     | 0   | 10 | 0.001       | 0.137333333 | 5.409629391  | UP   |
| novel_mir115    | 22  | 0  | 0.210666667 | 0.001       | -4.371730323 | DOWN |
| novel_mir64     | 22  | 0  | 0.210666667 | 0.001       | -4.371730323 | DOWN |
| novel_mir150    | 22  | 0  | 0.210666667 | 0.001       | -4.371730323 | DOWN |
| novel_mir507    | 22  | 0  | 0.210666667 | 0.001       | -4.371730323 | DOWN |
| novel_mir76     | 22  | 0  | 0.210666667 | 0.001       | -4.371730323 | DOWN |
| novel_mir781    | 22  | 0  | 0.210666667 | 0.001       | -4.371730323 | DOWN |
| novel_mir78     | 28  | 35 | 0.277       | 0.437       | 1.409629391  | UP   |
| novel_mir628    | 21  | 0  | 0.200666667 | 0.001       | -4.304616127 | DOWN |
| novel_mir248    | 21  | 0  | 0.200666667 | 0.001       | -4.304616127 | DOWN |
| novel_mir84     | 21  | 0  | 0.214       | 0.001       | -4.304616127 | DOWN |
| novel_mir797    | 21  | 0  | 0.200666667 | 0.001       | -4.304616127 | DOWN |
| novel_mir73     | 21  | 0  | 0.200666667 | 0.001       | -4.304616127 | DOWN |
| novel_mir417    | 21  | 0  | 0.200666667 | 0.001       | -4.304616127 | DOWN |
| novel_mir57     | 21  | 0  | 0.200666667 | 0.001       | -4.304616127 | DOWN |
| novel_mir528    | 21  | 0  | 0.200666667 | 0.001       | -4.304616127 | DOWN |
| mmu-miR-935     | 111 | 25 | 1.1         | 0.316666667 | -1.06285838  | DOWN |
| novel_mir46     | 47  | 48 | 0.447333333 | 0.620333333 | 1.118074945  | UP   |
| novel_mir35     | 101 | 22 | 0.977       | 0.304       | -1.111078568 | DOWN |
| novel_mir505    | 113 | 26 | 1.090333333 | 0.330333333 | -1.032037948 | DOWN |
| novel_mir102    | 61  | 10 | 0.593666667 | 0.137333333 | -1.521107947 | DOWN |
| novel_mir467    | 20  | 0  | 0.190666667 | 0.001       | -4.234226799 | DOWN |

|                 |    |    |             |             |              |      |
|-----------------|----|----|-------------|-------------|--------------|------|
| novel_mir54     | 20 | 0  | 0.207       | 0.001       | -4.234226799 | DOWN |
| novel_mir261    | 20 | 0  | 0.190666667 | 0.001       | -4.234226799 | DOWN |
| novel_mir104    | 20 | 0  | 0.190666667 | 0.001       | -4.234226799 | DOWN |
| novel_mir176    | 20 | 0  | 0.190666667 | 0.001       | -4.234226799 | DOWN |
| novel_mir701    | 20 | 0  | 0.190666667 | 0.001       | -4.234226799 | DOWN |
| novel_mir686    | 20 | 0  | 0.190666667 | 0.001       | -4.234226799 | DOWN |
| novel_mir201    | 19 | 0  | 0.180666667 | 0.001       | -4.160226217 | DOWN |
| novel_mir538    | 19 | 0  | 0.180666667 | 0.001       | -4.160226217 | DOWN |
| novel_mir651    | 19 | 0  | 0.180666667 | 0.001       | -4.160226217 | DOWN |
| novel_mir780    | 19 | 0  | 0.180666667 | 0.001       | -4.160226217 | DOWN |
| novel_mir195    | 19 | 0  | 0.180666667 | 0.001       | -4.160226217 | DOWN |
| novel_mir518    | 19 | 0  | 0.180666667 | 0.001       | -4.160226217 | DOWN |
| novel_mir710    | 19 | 0  | 0.180666667 | 0.001       | -4.160226217 | DOWN |
| novel_mir431    | 19 | 0  | 0.180666667 | 0.001       | -4.160226217 | DOWN |
| novel_mir632    | 19 | 0  | 0.180666667 | 0.001       | -4.160226217 | DOWN |
| novel_mir430    | 19 | 0  | 0.210666667 | 0.001       | -4.160226217 | DOWN |
| novel_mir642    | 19 | 0  | 0.180666667 | 0.001       | -4.160226217 | DOWN |
| novel_mir409    | 14 | 22 | 0.134       | 0.304       | 1.739777993  | UP   |
| mmu-miR-34b-3p  | 98 | 22 | 0.993333333 | 0.273333333 | -1.067576929 | DOWN |
| mmu-miR-3473d   | 58 | 10 | 0.573333333 | 0.126666667 | -1.448351604 | DOWN |
| novel_mir641    | 18 | 0  | 0.170666667 | 0.001       | -4.082223705 | DOWN |
| novel_mir365    | 18 | 0  | 0.170666667 | 0.001       | -4.082223705 | DOWN |
| novel_mir336    | 18 | 0  | 0.170666667 | 0.001       | -4.082223705 | DOWN |
| mmu-miR-669a-3p | 8  | 16 | 0.090666667 | 0.196666667 | 2.087701296  | UP   |
| mmu-miR-190a-3p | 74 | 15 | 0.74        | 0.183333333 | -1.214861474 | DOWN |
| mmu-miR-877-5p  | 39 | 5  | 0.396666667 | 0.06        | -1.875772828 | DOWN |
| novel_mir805    | 28 | 32 | 0.267333333 | 0.440666667 | 1.280346374  | UP   |
| novel_mir223    | 26 | 30 | 0.290666667 | 0.410666667 | 1.294152174  | UP   |
| novel_mir183    | 17 | 0  | 0.164       | 0.001       | -3.999761545 | DOWN |
| novel_mir203    | 17 | 0  | 0.164       | 0.001       | -3.999761545 | DOWN |
| novel_mir761    | 17 | 0  | 0.164       | 0.001       | -3.999761545 | DOWN |
| novel_mir812    | 17 | 0  | 0.164       | 0.001       | -3.999761545 | DOWN |
| novel_mir171    | 17 | 0  | 0.164       | 0.001       | -3.999761545 | DOWN |
| novel_mir283    | 17 | 0  | 0.164       | 0.001       | -3.999761545 | DOWN |
| novel_mir798    | 17 | 0  | 0.164       | 0.001       | -3.999761545 | DOWN |
| novel_mir764    | 17 | 0  | 0.164       | 0.001       | -3.999761545 | DOWN |
| novel_mir179    | 75 | 16 | 0.717333333 | 0.187333333 | -1.141117394 | DOWN |
